# Supplementary material for: Genomic Analysis of Salmonella enterica Serovar Typhimurium Characterizes Strain Diversity for Recent U.S. Salmonellosis Cases and Identifies Mutations Linked to Loss of Fitness under Nitrosative and Oxidative Stress
Source: PubMed Central journal article supplement (PMC4810482; doi:10.1128/mbio.00154-16), 2016-03-08

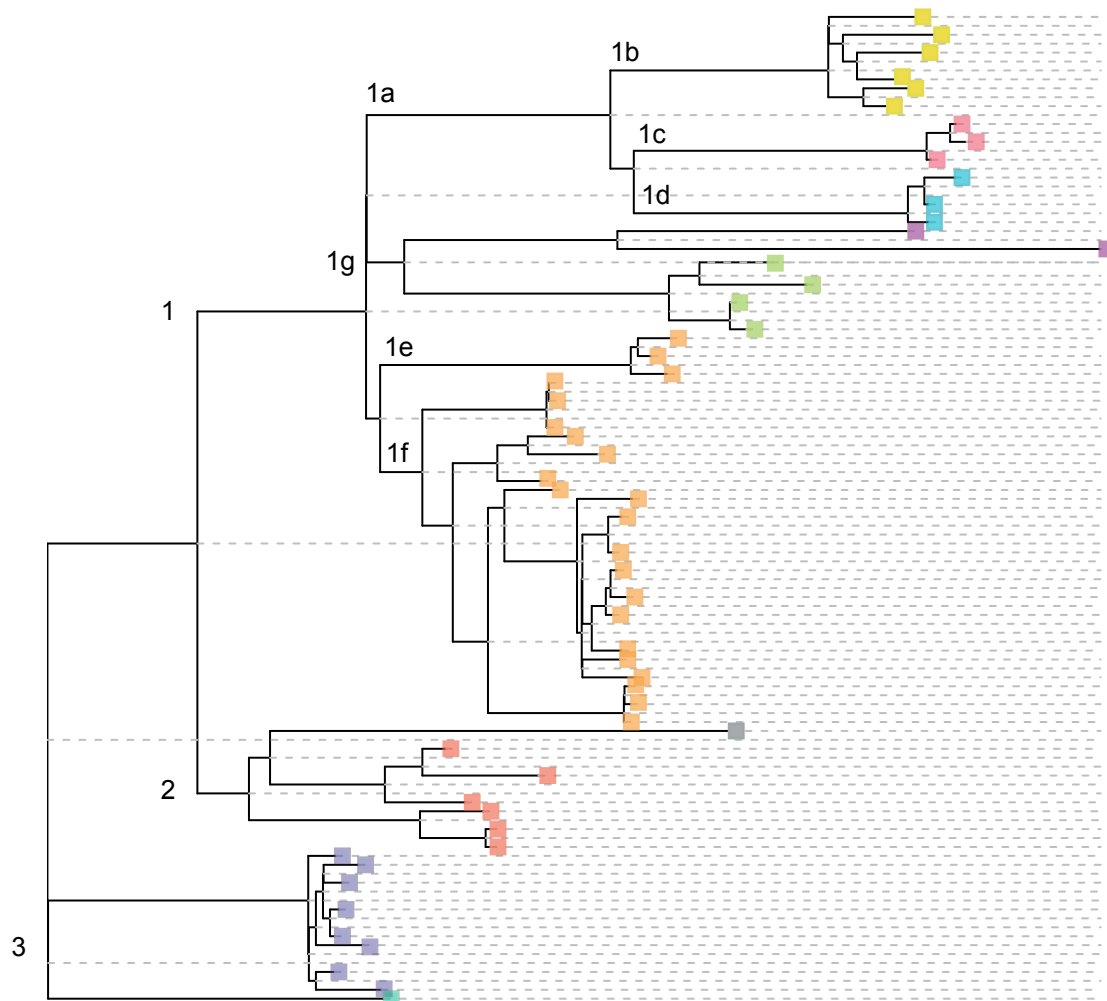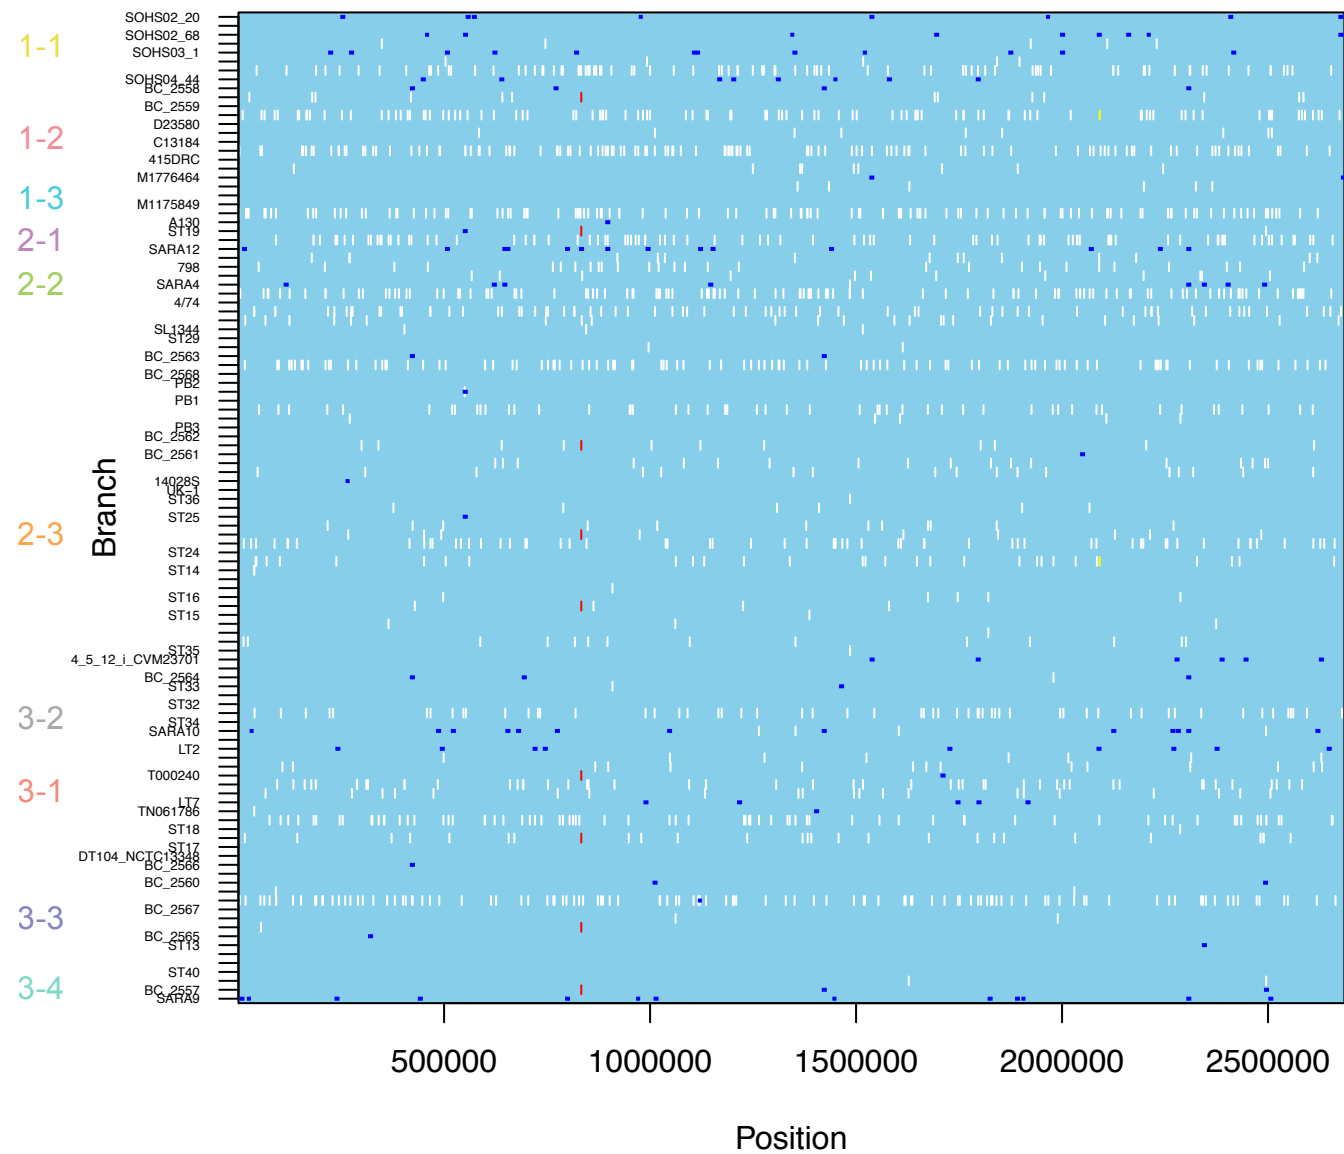

Supplement: mbo001162710sf2.pdf [file mbo001162710sf2.pdf]
